# Supplementary material for: Association between Life’s Essential 8 and abdominal aortic calcification: findings from a national study
Source: Research Square preprint supplement (doi:10.21203/rs.3.rs-4987264/v1), 2024-10-21
Supplement: Supplementary file 1 [file 112d79a19c8d8fb0c09722cd.docx]

Highlights

There was a nonlinear and linear dose–response inverse associations of total CVH score with AAC and severe AAC, respectively.

For the eight individual CVH metrics, well management of nicotine exposure, blood glucose and blood pressure was the major individual contributor to prevent AAC. Equally, enough engagement of physical activity could partly reduce AAC risk.

Earlier efforts on promoting CVH metrics should be highlighted to reduce AAC prevalence and subsequent CVD in later life.
