# Supplementary material for: Association between Life’s Essential 8 and abdominal aortic calcification: findings from a national study
Source: Research Square preprint supplement (doi:10.21203/rs.3.rs-4987264/v1), 2024-10-21
Supplement: Supplementary file 2 [file 345848ee49115d8709347fd5.docx]

| Table S1. *P* values of the Spearman correlation analysis between AAC-score, total CVH scores and baseline continuous variables. | | | | | | | | | | |
| --- | --- | --- | --- | --- | --- | --- | --- | --- | --- | --- |
| Variable | AAC-score | Total CVH-score | BMI | SBP | DBP | Blood glucose | HbA1C | non-HDLC | PA time | Sleep hour |
| AAC-score | 0.0000 | 0.0000 | 0.0003 | 0.0000 | 0.0000 | 0.0000 | 0.0000 | 0.0086 | 0.0003 | 0.0000 |
| Total CVH-score | 0.0000 | 0.0000 | 0.0000 | 0.0000 | 0.0000 | 0.0000 | 0.0000 | 0.0000 | 0.0003 | 0.0000 |
| BMI | 0.0003 | 0.0000 | 0.0000 | 0.0001 | 0.0009 | 0.0000 | 0.0000 | 0.0000 | 0.5084 | 0.0074 |
| SBP | 0.0000 | 0.0000 | 0.0001 | 0.0000 | 0.0000 | 0.0000 | 0.0000 | 0.0047 | 0.1181 | 0.0574 |
| DBP | 0.0000 | 0.0000 | 0.0009 | 0.0000 | 0.0000 | 0.3803 | 0.0070 | 0.0000 | 0.0124 | 0.0009 |
| Blood glucose | 0.0000 | 0.0000 | 0.0000 | 0.0000 | 0.3803 | 0.0000 | 0.0000 | 0.0676 | 0.0607 | 0.0878 |
| HBA1C | 0.0000 | 0.0000 | 0.0000 | 0.0000 | 0.0070 | 0.0000 | 0.0000 | 0.2048 | 0.1454 | 0.3715 |
| non-HDLC | 0.0086 | 0.0000 | 0.0000 | 0.0047 | 0.0000 | 0.0676 | 0.2048 | 0.0000 | 0.3245 | 0.0982 |
| PA time | 0.0003 | 0.0000 | 0.5084 | 0.1181 | 0.0124 | 0.0607 | 0.1454 | 0.3245 | 0.0000 | 0.0005 |
| Sleep hour | 0.0000 | 0.0000 | 0.0074 | 0.0574 | 0.0009 | 0.0878 | 0.3715 | 0.0982 | 0.0005 | 0.0000 |
| AAC, abdominal aortic calcification; CVH, cardiovascular health; BMI, body mass index; SBP, systolic blood pressure; DBP, diastolic blood pressure; HbA1c, glycated hemoglobin; non-HDLC, non-high-density lipoprotein cholesterol; PA, physical activity. | | | | | | | | | | |
|  |
|  |

| Table S2. Associations between *Life’s Essential 8* total cardiovascular health (CVH) score and abdominal aortic calcification (AAC) scores in different subgroupsa | | | |
| --- | --- | --- | --- |
| Subgroup | No. of Patients (%) | Fully adjusted β (95% CI), *P* value | *P* for interaction |
| Overall | 2403 (100) | **-0.14 (-0.23, -0.04) 0.0064** |  |
| Gender | | | 0.009 |
| Male | 1131 (47.07) | 0.02 (-0.13, 0.17) 0.8363 |  |
| Femal | 1272 (52.93) | **-0.25 (-0.37, -0.12) 0.0002** |  |
| Age group | | | 0.464 |
| 40–54 years | 993 (41.32) | **-0.11 (-0.17, -0.05) 0.0008** |  |
| 55–64 years | 623 (25.93) | **-0.18 (-0.33, -0.03) 0.0219** |  |
| 65–80 years | 787 (32.75） | -0.24 (-0.51, 0.02) 0.0708 |  |
| Race/ethnicity | | | 0.270 |
| Mexican American | 308 (12.82) | 0.09 (-0.12, 0.30) 0.4124 |  |
| Non-Hispanic White | 1128 (46.94) | **-0.25 (-0.41, -0.09) 0.0020** |  |
| Non-Hispanic Black | 461 (19.18) | -0.00 (-0.21, 0.21) 0.9777 |  |
| Other | 506 (21.06) | -0.12 (-0.30, 0.07) 0.2065 |  |
| Family income, income/poverty ratio | | | 0.523 |
| < 1.0 | 381 (15.86) | -0.15 (-0.40, 0.09) 0.2192 |  |
| 1.0 to 3.0 | 1006 (41.86) | -0.06 (-0.21, 0.10) 0.4925 |  |
| > 3.0 | 1016 (42.28) | **-0.16 (-0.31, -0.02) 0.0269** |  |
| Statin therapy | | | 0.854 |
| Yes | 692 (28.80) | -0.07 (-0.34, 0.21) 0.6401 |  |
| No | 1711 (71.20) | **-0.20 (-0.29, -0.12) <0.0001** |  |
| Family history of diabetes mellitus | | | 0.208 |
| Yes | 1001 (41.66) | **-0.23 (-0.37, -0.08) 0.0024** |  |
| No | 1402 (58.34) | -0.08 (-0.21, 0.06) 0.2672 |  |
| Family history of heart disease | | | 0.551 |
| Yes | 291 (12.11) | -0.05 (-0.38, 0.28) 0.7751 |  |
| No | 2112 (87.89) | **-0.14 (-0.24, -0.04) 0.0056** |  |
| Chronic kidney disease | | | 0.188 |
| Yes | 270 (11.24) | -0.14 (-0.64, 0.36) 0.5832 |  |
| No | 2133 (88.76) | **-0.12 (-0.22, -0.03) 0.0066** |  |
| CI, confidence interval;  aResults are expressed as multivariable-adjusted β and corresponding 95% CI in continuous analyses (per 10 increasement of total CVH scores) after controlling covariates including age, gender, race/ethnicity, education level, marital status, ratio of family income poverty, statin therapy, family history of heart disease and diabetes mellitus, chronic kidney disease. | | | |
|  |
|  |
|  |

| Table S3. Associations between *Life’s Essential 8* total cardiovascular health (CVH) score and abdominal aortic calcification (AAC) in different subgroupsa | | | |
| --- | --- | --- | --- |
| Subgroup | No. of Patients (%) | Fully adjusted OR (95% CI), *P* value | *P* for interaction |
| Overall | 2403 (100) | **0.87 (0.81, 0.94) 0.0002** |  |
| Gender | | | 0.189 |
| Male | 1131 (47.07) | 0.92 (0.82, 1.03) 0.1562 |  |
| Femal | 1272 (52.93) | **0.83 (0.76, 0.92) 0.0004** |  |
| Age group | | | 0.360 |
| 40–54 years | 993 (41.32) | **0.86 (0.76, 0.98) 0.0279** |  |
| 55–64 years | 623 (25.93) | **0.79 (0.68, 0.92) 0.0018** |  |
| 65–80 years | 787 (32.75） | 0.91 (0.80, 1.02) 0.1071 |  |
| Race/ethnicity | | | 0.075 |
| Mexican American | 308 (12.82) | 1.08 (0.85, 1.37) 0.5415 |  |
| Non-Hispanic White | 1128 (46.94) | **0.82 (0.74, 0.91) 0.0001** |  |
| Non-Hispanic Black | 461 (19.18) | 0.96 (0.80, 1.15) 0.6410 |  |
| Other | 506 (21.06) | 0.85 (0.72, 1.02) 0.0745 |  |
| Family income, income/poverty ratio | | | 0.793 |
| < 1.0 | 381 (15.86) | 0.86 (0.71, 1.05) 0.1446 |  |
| 1.0 to 3.0 | 1006 (41.86) | 0.90 (0.81, 1.01) 0.0829 |  |
| > 3.0 | 1016 (42.28) | **0.86 (0.77, 0.97) 0.0107** |  |
| Statin therapy | | | 0.317 |
| Yes | 692 (28.80) | 0.93 (0.82, 1.06) 0.3067 |  |
| No | 1711 (71.20) | **0.82 (0.75, 0.90) <0.0001** |  |
| Family history of diabetes mellitus | | | 0.230 |
| Yes | 1001 (41.66) | **0.81 (0.73, 0.91) 0.0004** |  |
| No | 1402 (58.34) | 0.91 (0.82, 1.00) 0.0575 |  |
| Family history of heart disease | | | 0.332 |
| Yes | 291 (12.11) | **0.78 (0.62, 0.99) 0.0410** |  |
| No | 2112 (87.89) | **0.88 (0.82, 0.96) 0.0020** |  |
| Chronic kidney disease | | | 0.101 |
| Yes | 270 (11.24) | 0.97 (0.79, 1.20) 0.7790 |  |
| No | 2133 (88.76) | **0.86 (0.80, 0.93) 0.0002** |  |
| OR, odds ratio; CI, confidence interval;  aResults are expressed as multivariable-adjusted OR and corresponding 95% CI in continuous analyses (per 10 increasement of total CVH) after controlling covariates including age, gender, race/ethnicity, education level, marital status, ratio of family income poverty, statin therapy, family history of heart disease and diabetes mellitus, chronic kidney disease. | | | |
|  |
|  |
|  |

| Table S4. Associations between *Life’s Essential 8* total cardiovascular health (CVH) score and severe abdominal aortic calcification (AAC) in different subgroupsa | | | |
| --- | --- | --- | --- |
| Subgroup | No. of Patients (%) | Fully adjusted β (95% CI), *P* value | *P* for interaction |
| Overall | 2403 (100) | **0.84 (0.74, 0.95) 0.0056** |  |
| Gender | | | 0.009 |
| Male | 1131 (47.07) | 1.03 (0.84, 1.25) 0.7961 |  |
| Femal | 1272 (52.93) | **0.73 (0.62, 0.86) 0.0002** |  |
| Age group | | | 0.195 |
| 40–54 years | 993 (41.32) | **0.58 (0.38, 0.89) 0.0133** |  |
| 55–64 years | 623 (25.93) | 0.84 (0.62, 1.13) 0.2486 |  |
| 65–80 years | 787 (32.75） | 0.88 (0.76, 1.02) 0.0893 |  |
| Race/ethnicity | | | 0.385 |
| Mexican American | 308 (12.82) | 1.15 (0.69, 1.92) 0.5938 |  |
| Non-Hispanic White | 1128 (46.94) | **0.80 (0.69, 0.94) 0.0068** |  |
| Non-Hispanic Black | 461 (19.18) | 0.80 (0.56, 1.15) 0.2293 |  |
| Other | 506 (21.06) | 0.86 (0.60, 1.21) 0.3853 |  |
| Family income, income/poverty ratio | | | 0.491 |
| < 1.0 | 381 (15.86) | 0.92 (0.61, 1.38) 0.6714 |  |
| 1.0 to 3.0 | 1006 (41.86) | 0.91 (0.76, 1.08) 0.2867 |  |
| > 3.0 | 1016 (42.28) | **0.77 (0.63, 0.95) 0.0135** |  |
| Statin therapy | | | 0.906 |
| Yes | 692 (28.80) | 0.92 (0.77, 1.09) 0.3338 |  |
| No | 1711 (71.20) | **0.74 (0.62, 0.88) 0.0008** |  |
| Family history of diabetes mellitus | | | 0.053 |
| Yes | 1001 (41.66) | **0.73 (0.60, 0.89) 0.0021** |  |
| No | 1402 (58.34) | 0.93 (0.79, 1.09) 0.3531 |  |
| Family history of heart disease | | | 0.332 |
| Yes | 291 (12.11) | 0.98 (0.70, 1.37) 0.9170 |  |
| No | 2112 (87.89) | **0.82 (0.72, 0.94) 0.0042** |  |
| Chronic kidney disease | | | 0.074 |
| Yes | 270 (11.24) | 0.86 (0.68, 1.08) 0.1978 |  |
| No | 2133 (88.76) | **0.84 (0.72, 0.97) 0.0197** |  |
| OR, odds ratio; CI, confidence interval;  aResults are expressed as multivariable-adjusted OR and corresponding 95% CI in continuous analyses (per 10 increasement of total CVH) after controlling covariates including age, gender, race/ethnicity, education level, marital status, ratio of family income poverty, statin therapy, family history of heart disease and diabetes mellitus, chronic kidney disease. | | | |
|  |
|  |
|  |
